# Supplementary material for: S-Gene Target Failure as an Effective Tool for Tracking the Emergence of Dominant SARS-CoV-2 Variants in Switzerland and Liechtenstein, Including Alpha, Delta, and Omicron BA.1, BA.2, and BA.4/BA.5
Source: MDPI journal article supplement (doi:10.3390/microorganisms12020321), 2024-02-03
Supplement: s1 [file s1]

## Supplementary material

Additional information regarding the calculation of sensitivity, specificity and accuracy

*Sensitivity, specificity and accuracy were calculated using the MedCalc statistical software where the parameters are defined as:*

$$\text{Sensitivity} = \frac{\text{True Positives}}{\text{True Positives} + \text{False Negatives}}$$

$$\text{Specificity} = \frac{\text{True Negatives}}{\text{True Negatives} + \text{False Positives}}$$

$$\text{Accuracy} = \text{Sensitivity} \times \text{Analytical prevalence} + \text{Specificity} \times (1 - \text{Analytical Prevalence})$$

*True Positives = SGTF in PCR and variant with  $\Delta$ H69/V70*

*False Positives = SGTF in PCR and variant lacking  $\Delta$ H69/V70*

*True Negatives = Triple positive in PCR and variant lacking  $\Delta$ H69/V70*

*False Negatives = Triple positive in PCR and variant with  $\Delta$ H69/V70*

*Analytical prevalence = Ratio of positive cases (True Positives + False Negatives) among all cases*

*Confidence intervals for sensitivity, specificity and accuracy are "exact" Clopper-Pearson confidence intervals.*

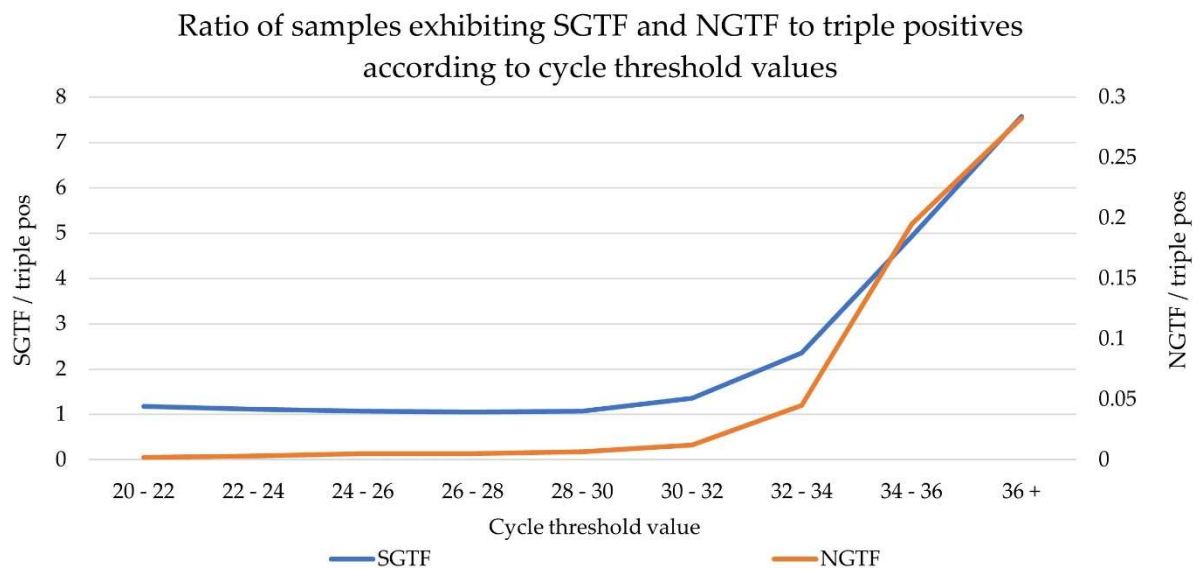

**Figure S1.** The ratio of samples presenting with S-gene target failure (SGTF) or N-gene target failure (NGTF) in relation to triple-positive samples. An increasing number of samples exhibiting SGTF or NGTF is observed when cycle threshold (CT) values for the ORF1ab target gene are greater than 30, as illustrated by the rising slope.

A decrease in median CT values of samples presenting with SGTF from approximately 30 to 20 was observed during the emergence of the alpha variant (Figure S2). Median CT values gradually decreased

until 50% SGTF was reached and then stayed constant during the period of dominance. This effect was reversed with the introduction of the delta variant where median CT values of SGTF positive samples increased again to 30+ values. The same effect, although not as substantial due to shorter transition periods, was observed during the change of delta to BA.1 (mean CT values decreased), BA.1 to BA.2 (mean CT values increased) and BA.2 to BA.5 (mean CT values decreased). These changes reflect the respective variants expansion in the population and the switch from nonspecific SGTF in low viral load samples to specific SGTF in high viral load samples.

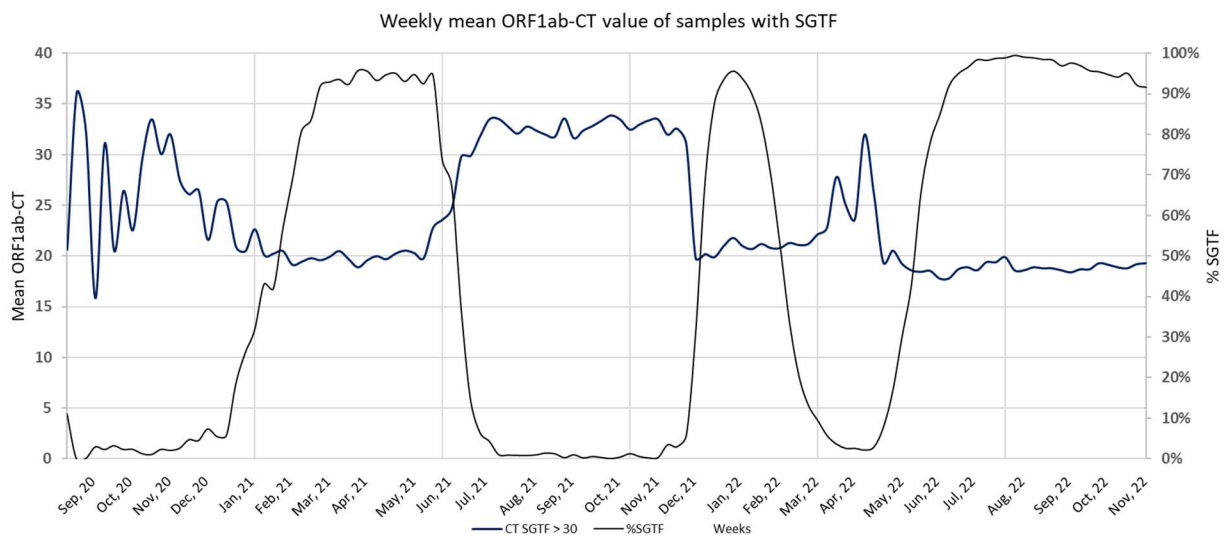

**Figure S2.** Weekly mean ORF1AB C<sub>t</sub>-value of SGTF positive samples. The frequency of SGTF is plotted to compare to the emergence of new dominant variants. Depicted is the change from unspecific SGTF with C<sub>t</sub>-value ~30 in low viral load samples to specific SGTF with C<sub>t</sub>-value ~20 in high viral load samples during the expansion of new SGTF positive variants.

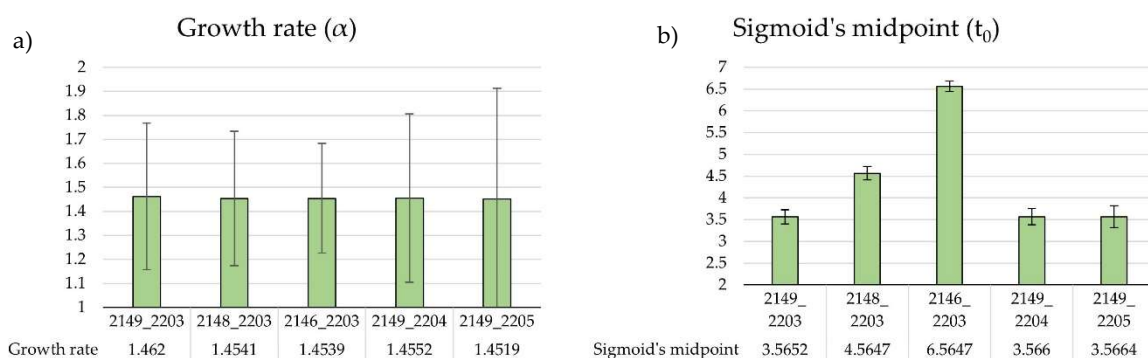

**Figure S3.** Sensitivity analysis for growth rate and sigmoid's midpoint depending on initialization of logistic fit to the dataset. The growth rate does not change significantly when the initialization point is moved in one-week intervals (a), while Sigmoid's midpoint changes accordingly (b). Depicted is the logistic fit for the Omicron BA.1 dataset, as this dataset is the least robust with the least datapoints due to its short emergence period.

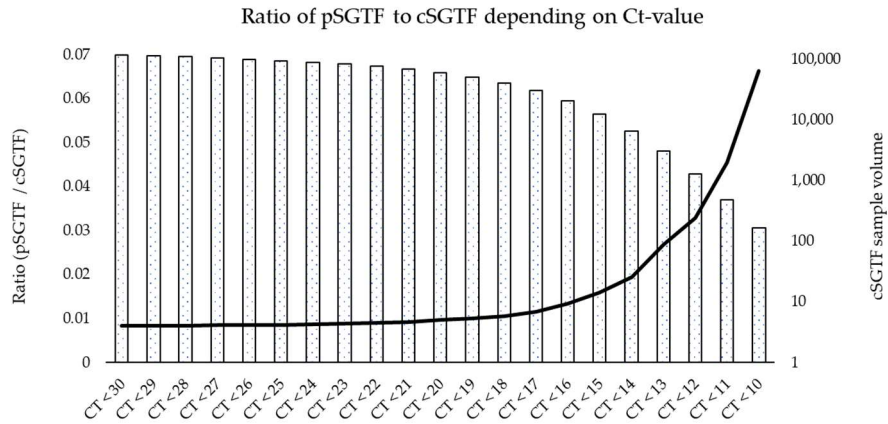

**Figure S4. The occurrence of partial S-gene target failure (pSGTF) is dependent on the cycle-threshold (Ct) value.** Depicted is the ratio of pSGTF (triple positives with S-gene shift > 4) to complete SGTF (cSGTF) according to Ct-values within our dataset. The presentation of pSGTF gets more frequent with decreasing Ct-value / increasing viral load in the sample, suggesting infrequent mismatch annealing if high numbers of S-gene amplicons are in the reaction mix.

**Table S1. B.1.1.7\* (Alpha) specific sensitivity and specificity.**

| VOC determination (Alpha) |               |       |           |       |                      |                       |
|---------------------------|---------------|-------|-----------|-------|----------------------|-----------------------|
|                           | TaqPath       | alpha | Non-alpha | Total |                      |                       |
| Total                     | SGTF positive | 3615  | 13        | 3628  | Sensitivity [95% CI] | 98.21 [97.72, 98.61]  |
|                           | SGTF negative | 66    | 1658      | 1724  | Specificity [95% CI] | 99.22 [98.67, 99.59]  |
|                           | Total         | 3681  | 1671      | 5352  | Accuracy [95% CI]    | 98.52 [98.16, 98.83]  |
| Total > 3.8               | SGTF positive | 3653  | 17        | 3670  | Sensitivity [95% CI] | 99.24 [98.90, 99.49]  |
|                           | SGTF negative | 28    | 1654      | 1682  | Specificity [95% CI] | 98.98 [98.38, 99.41]  |
|                           | Total         | 3681  | 1671      | 5352  | Accuracy [95% CI]    | 99.16 [98.88, 99.39]  |
| WGS                       | SGTF positive | 337   | 12        | 349   | Sensitivity [95% CI] | 97.68 [95.48, 98.99]  |
|                           | SGTF negative | 8     | 182       | 190   | Specificity [95% CI] | 93.81 [89.44, 96.76]  |
|                           | Total         | 345   | 194       | 539   | Accuracy [95% CI]    | 96.29 [94.33, 97.72]  |
| WGS > 3.8                 | SGTF positive | 342   | 13        | 355   | Sensitivity [95% CI] | 99.13 [97.48, 99.82]  |
|                           | SGTF negative | 3     | 181       | 184   | Specificity [95% CI] | 93.30 [88.81, 96.38]  |
|                           | Total         | 345   | 194       | 539   | Accuracy [95% CI]    | 97.03 [95.22, 98.29]  |
| SNP                       | SGTF positive | 3278  | 1         | 3279  | Sensitivity [95% CI] | 98.35 [97.86, 98.75]  |
|                           | SGTF negative | 55    | 1451      | 1506  | Specificity [95% CI] | 99.93 [99.62, 100.00] |
|                           | Total         | 3333  | 1452      | 4785  | Accuracy [95% CI]    | 98.83 [98.48, 99.11]  |
| SNP >3.8                  | SGTF positive | 3308  | 4         | 3312  | Sensitivity [95% CI] | 99.25 [98.89, 99.51]  |
|                           | SGTF negative | 25    | 1448      | 1473  | Specificity [95% CI] | 99.72 [99.30, 99.92]  |
|                           | Total         | 3333  | 1452      | 4785  | Accuracy [95% CI]    | 99.39 [99.13, 99.59]  |

**Table S2.** B.1.617.2\* (Delta) specific sensitivity and specificity.

| VOC determination (Delta) |               |       |           |       |                      |                           |
|---------------------------|---------------|-------|-----------|-------|----------------------|---------------------------|
|                           | TaqPath       | delta | Non-delta | Total |                      |                           |
| Total                     | SGTF positive | 0     | 10        | 10    | Sensitivity [95% CI] | 100.00% 99.46% to 100.00% |
|                           | SGTF negative | 679   | 1         | 680   | Specificity [95% CI] | 90.91% 58.72% to 99.77%   |
|                           | Total         | 679   | 11        | 690   | Accuracy [95% CI]    | 99.86% 99.20% to 100.00%  |
| Total > 3.8               | SGTF positive | 2     | 11        | 13    | Sensitivity [95% CI] | 99.71% 98.94% to 99.96%   |
|                           | SGTF negative | 677   | 0         | 677   | Specificity [95% CI] | 100.00% 71.51% to 100.00% |
|                           | Total         | 679   | 11        | 690   | Accuracy [95% CI]    | 99.71% 98.96% to 99.96%   |
| WGS                       | SGTF positive | 0     | 10        | 10    | Sensitivity [95% CI] | 100.00% 98.46% to 100.00% |
|                           | SGTF negative | 238   | 1         | 239   | Specificity [95% CI] | 90.91% 58.72% to 99.77%   |
|                           | Total         | 238   | 11        | 249   | Accuracy [95% CI]    | 99.60% 97.78% to 99.99%   |
| WGS > 3.8                 | SGTF positive | 1     | 11        | 12    | Sensitivity [95% CI] | 99.58% 97.68% to 99.99%   |
|                           | SGTF negative | 237   | 0         | 237   | Specificity [95% CI] | 100.00% 71.51% to 100.00% |
|                           | Total         | 238   | 11        | 249   | Accuracy [95% CI]    | 99.60% 97.78% to 99.99%   |
| SNP                       | SGTF positive | 0     | 0         | 0     | Sensitivity [95% CI] | 100.00% 99.17% to 100.00% |
|                           | SGTF negative | 441   | 0         | 441   | Specificity [95% CI] | -                         |
|                           | Total         | 441   | 0         | 441   | Accuracy [95% CI]    | -                         |
| SNP >3.8                  | SGTF positive | 1     | 0         | 1     | Sensitivity [95% CI] | 99.77% 98.74% to 99.99%   |
|                           | SGTF negative | 440   | 0         | 440   | Specificity [95% CI] | -                         |
|                           | Total         | 441   | 0         | 441   | Accuracy [95% CI]    | -                         |

**Table S3.** B.1.1.529.1\* (BA.1) specific sensitivity and specificity.

| VOC determination (BA.1) |               |      |          |       |                      |                           |
|--------------------------|---------------|------|----------|-------|----------------------|---------------------------|
|                          | TaqPath       | BA.1 | Non-BA.1 | Total |                      |                           |
| Total                    | SGTF positive | 2994 | 5        | 2999  | Sensitivity [95% CI] | 93.94% 93.06% to 94.75%   |
|                          | SGTF negative | 193  | 1230     | 1423  | Specificity [95% CI] | 95.87% 94.63% to 96.89%   |
|                          | Total         | 3187 | 1283     | 4422  | Accuracy [95% CI]    | 94.50% 93.79% to 95.15%   |
| Total > 3.8              | SGTF positive | 3171 | 9        | 3180  | Sensitivity [95% CI] | 99.50% 99.19% to 99.71%   |
|                          | SGTF negative | 16   | 1226     | 1242  | Specificity [95% CI] | 99.27% 98.62% to 99.67%   |
|                          | Total         | 3187 | 1235     | 4422  | Accuracy [95% CI]    | 99.43% 99.17% to 99.63%   |
| WGS                      | SGTF positive | 1092 | 5        | 1097  | Sensitivity [95% CI] | 100.00% 99.66% to 100.00% |
|                          | SGTF negative | 0    | 285      | 285   | Specificity [95% CI] | 98.28% 96.02% to 99.44%   |
|                          | Total         | 1092 | 290      | 1382  | Accuracy [95% CI]    | 99.64% 99.16% to 99.88%   |
| WGS > 3.8                | SGTF positive | 1092 | 6        | 1098  | Sensitivity [95% CI] | 100.00% 99.66% to 100.00% |
|                          | SGTF negative | 0    | 284      | 284   | Specificity [95% CI] | 97.93% 95.55% to 99.24%   |
|                          | Total         | 1092 | 290      | 1382  | Accuracy [95% CI]    | 99.57% 99.06% to 99.84%   |
| SNP                      | SGTF positive | 1902 | 0        | 1902  | Sensitivity [95% CI] | 90.79% 89.47% to 91.99%   |
|                          | SGTF negative | 193  | 945      | 1138  | Specificity [95% CI] | 100.00% 99.61% to 100.00% |
|                          | Total         | 2095 | 945      | 3040  | Accuracy [95% CI]    | 93.65% 92.73% to 94.49%   |
| SNP >3.8                 | SGTF positive | 2079 | 3        | 2082  | Sensitivity [95% CI] | 99.24% 98.76% to 99.56%   |
|                          | SGTF negative | 16   | 942      | 958   | Specificity [95% CI] | 99.68% 99.08% to 99.93%   |
|                          | Total         | 2095 | 945      | 3040  | Accuracy [95% CI]    | 99.37% 99.03% to 99.62%   |

**Table S4.** B.1.1.529.2\* (BA.2) specific sensitivity and specificity.

| VOC determination (BA.2) |               |      |          |       |                      |         |                   |
|--------------------------|---------------|------|----------|-------|----------------------|---------|-------------------|
| TaqPath                  |               | BA.2 | Non-BA.2 | Total |                      |         |                   |
| Total                    | SGTF positive | 2    | 844      | 846   | Sensitivity [95% CI] | 99.91%  | 99.68% to 99.99%  |
|                          | SGTF negative | 2230 | 423      | 2653  | Specificity [95% CI] | 66.61%  | 63.94% to 69.21%  |
|                          | Total         | 2232 | 1267     | 3499  | Accuracy [95% CI]    | 87.85%  | 86.73% to 88.92%  |
| Total > 3.8              | SGTF positive | 16   | 1134     | 1150  | Sensitivity [95% CI] | 99.28%  | 98.84% to 99.59%  |
|                          | SGTF negative | 2216 | 133      | 2349  | Specificity [95% CI] | 89.50%  | 87.68% to 91.14%  |
|                          | Total         | 2232 | 1267     | 3499  | Accuracy [95% CI]    | 95.74%  | 95.02% to 96.39%  |
| WGS                      | SGTF positive | 2    | 820      | 822   | Sensitivity [95% CI] | 99.74%  | 99.07% to 99.97%  |
|                          | SGTF negative | 770  | 11       | 781   | Specificity [95% CI] | 87.79%  | 85.52% to 89.83%  |
|                          | Total         | 772  | 831      | 1603  | Accuracy [95% CI]    | 93.20%  | 91.90% to 94.35%  |
| WGS > 3.8                | SGTF positive | 4    | 825      | 829   | Sensitivity [95% CI] | 99.48%  | 98.68% to 99.86%  |
|                          | SGTF negative | 768  | 6        | 774   | Specificity [95% CI] | 99.28%  | 98.44% to 99.73%  |
|                          | Total         | 772  | 831      | 1603  | Accuracy [95% CI]    | 99.38%  | 98.86% to 99.70%  |
| SNP                      | SGTF positive | 0    | 24       | 24    | Sensitivity [95% CI] | 100.00% | 99.75% to 100.00% |
|                          | SGTF negative | 1460 | 412      | 1872  | Specificity [95% CI] | 5.50%   | 3.56% to 8.08%    |
|                          | Total         | 1460 | 436      | 1896  | Accuracy [95% CI]    | 78.27%  | 76.34% to 80.11%  |
| SNP > 3.8                | SGTF positive | 12   | 309      | 321   | Sensitivity [95% CI] | 99.18%  | 98.57% to 99.57%  |
|                          | SGTF negative | 1448 | 127      | 1575  | Specificity [95% CI] | 70.87%  | 66.36% to 75.10%  |
|                          | Total         | 1460 | 436      | 1896  | Accuracy [95% CI]    | 92.67%  | 91.40% to 93.80%  |

**Table S5.** B.1.1.529.4\* / B.1.1.529.5\* (BA.4 / BA.5) specific sensitivity and specificity.

| VOC determination (BA.4 / BA.5) |               |             |                 |       |                      |         |                   |
|---------------------------------|---------------|-------------|-----------------|-------|----------------------|---------|-------------------|
| TaqPath                         |               | BA.4 / BA.5 | Non-BA.4 / BA.5 | Total |                      |         |                   |
| Total                           | SGTF positive | 457         | 21              | 478   | Sensitivity [95% CI] | 99.35%  | 98.11% to 99.87%  |
|                                 | SGTF negative | 3           | 340             | 343   | Specificity [95% CI] | 94.18%  | 91.25% to 96.36%  |
|                                 | Total         | 460         | 361             | 821   | Accuracy [95% CI]    | 97.08%  | 95.68% to 98.12%  |
| Total > 3.8                     | SGTF positive | 460         | 21              | 481   | Sensitivity [95% CI] | 100.00% | 99.20% to 100.00% |
|                                 | SGTF negative | 0           | 340             | 340   | Specificity [95% CI] | 94.18%  | 91.25% to 96.36%  |
|                                 | Total         | 460         | 361             | 821   | Accuracy [95% CI]    | 97.44%  | 96.12% to 98.41%  |

**Table S6.** Sensitivity and specificity based on VOC determination with mutation specific PCR (SNP).

| VOC determination (SNP) |               |           |             |       |                                                                               |       |                |
|-------------------------|---------------|-----------|-------------|-------|-------------------------------------------------------------------------------|-------|----------------|
| TaqPath                 |               | SGTF VOC* | nSGTF VOC** | Total | * Variants – B.1.258, alpha, BA.1, BA.4/BA.5<br>** Variants – WT, delta, BA.2 |       |                |
| SGTF                    | SGTF positive | 5202      | 9           | 5211  | Sensitivity [95% CI]                                                          | 90.2% | [89.4%, 91.0%] |
|                         | SGTF negative | 564       | 4257        | 4821  | Specificity [95% CI]                                                          | 99.8% | [99.6%, 99.9%] |
|                         | Total         | 5766      | 4266        | 10032 | Accuracy [95% CI]                                                             | 94.3% | [93.8%, 94.7%] |
| pSGTF > 3.8             | SGTF positive | 5610      | 33          | 5643  | Sensitivity [95% CI]                                                          | 97.3% | [96.8%, 97.7%] |
|                         | SGTF negative | 156       | 4233        | 4389  | Specificity [95% CI]                                                          | 99.2% | [98.9%, 99.5%] |
|                         | Total         | 5766      | 4266        | 10032 | Accuracy [95% CI]                                                             | 98.1% | [97.8%, 98.4%] |

**Table S7.** Sensitivity and specificity based on VOC determination with whole-genome-sequencing (WGS).

| VOC determination (WGS) |               |           |             |       |                                                                               |       |                |
|-------------------------|---------------|-----------|-------------|-------|-------------------------------------------------------------------------------|-------|----------------|
| TaqPath                 |               | SGTF VOC* | nSGTF VOC** | Total | * Variants – B.1.258, alpha, BA.1, BA.4/BA.5<br>** Variants – WT, delta, BA.2 |       |                |
| SGTF                    | SGTF positive | 3359      | 47          | 3406  | Sensitivity [95% CI]                                                          | 98.3% | [97.8%, 98.7%] |
|                         | SGTF negative | 57        | 4229        | 4286  | Specificity [95% CI]                                                          | 98.9% | [98.5%, 99.2%] |
|                         | Total         | 3416      | 4276        | 7692  | Accuracy [95% CI]                                                             | 98.7% | [98.4%, 98.9%] |
| pSGTF > 3.8             | SGTF positive | 3403      | 61          | 3464  | Sensitivity [95% CI]                                                          | 99.6% | [99.4%, 99.8%] |
|                         | SGTF negative | 13        | 4215        | 4228  | Specificity [95% CI]                                                          | 98.6% | [98.2%, 98.9%] |
|                         | Total         | 3416      | 4276        | 7692  | Accuracy [95% CI]                                                             | 99.0% | [98.8%, 99.2%] |

**Table S8.** Dominant SARS-CoV-2 variants and the respective amount of samples identified in this study by either whole-genome sequencing (WGS) or mutation specific PCR (SNP).

| <b>WHO label</b>    | <b>Pango lineage</b> | <b>Total</b> | <b>WGS</b> | <b>SNP</b> | <b>% total</b> |
|---------------------|----------------------|--------------|------------|------------|----------------|
| <i>WT</i>           | <i>WT</i>            | 1432         | 22         | 1410       | 8.1            |
| <i>alpha</i>        | <i>B.1.1.7*</i>      | 3152         | 138        | 3014       | 17.8           |
| <i>delta</i>        | <i>B.1.617.2*</i>    | 3837         | 2492       | 1345       | 21.6           |
| <i>Omicron BA.1</i> | <i>B.1.1.529.1*</i>  | 4129         | 1695       | 2434       | 23.3           |
| <i>Omicron BA.2</i> | <i>B.1.1.529.2*</i>  | 3017         | 1547       | 1470       | 17.0           |
| <i>Omicron BA.4</i> | <i>B.1.1.529.4*</i>  | 94           | 94         | 0          | 0.5            |
| <i>Omicron BA.5</i> | <i>B.1.1.529.5*</i>  | 1259         | 1259       | 0          | 7.1            |
| <b>Others</b>       |                      | 804          | 445        | 359        | 4.5            |
| <b>Sum</b>          |                      | 17724        | 7692       | 10032      |                |
